# Supplementary material for: Magnetic activated carbon as an adsorbent for extraction of DMMP from aqueous samples followed by GC-IMS analysis
Source: Royal Society of Chemistry journal article supplement (doi:10.1039/d3ay01009k), 2023-01-01
Supplement: d3ay01009k1.pdf [file d3ay01009k1.pdf]

## Electronic Supplementary Material

### Magnetic activated carbon as an adsorbent for extraction of DMMP from aqueous samples followed by GC-IMS analysis

Hossein Shahrabi Farahani<sup>1</sup>, Mostafa Najafi<sup>1</sup>, Mohammad Behbahani<sup>2</sup>, Mohammad Taghi Naseri<sup>3</sup>

<sup>1</sup> Department of Chemistry, Faculty of Sciences, Imam Hossein University, Tehran, Iran.

<sup>2</sup> Department of Chemistry, Faculty of Sciences, Shahid Chamran University of Ahvaz, Ahvaz, Iran.

<sup>3</sup> Defense Chemical Research Laboratory (DCRL), P.O. Box 31585-1461, Karaj, Iran.

### Correlation of laboratory data and predicted values of DMMP adsorption by experimental design

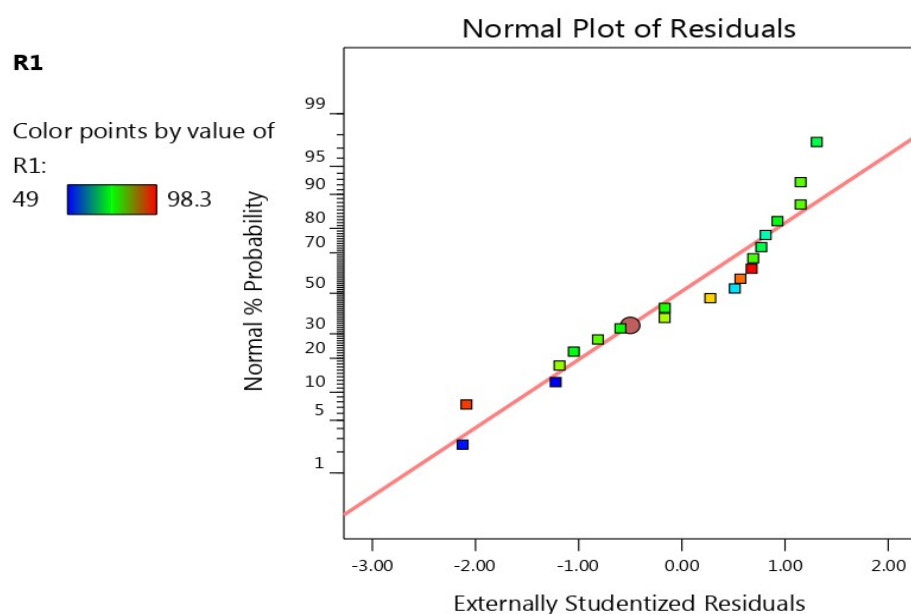

**Fig S1** Comparison of predicted response values in the model with laboratory values

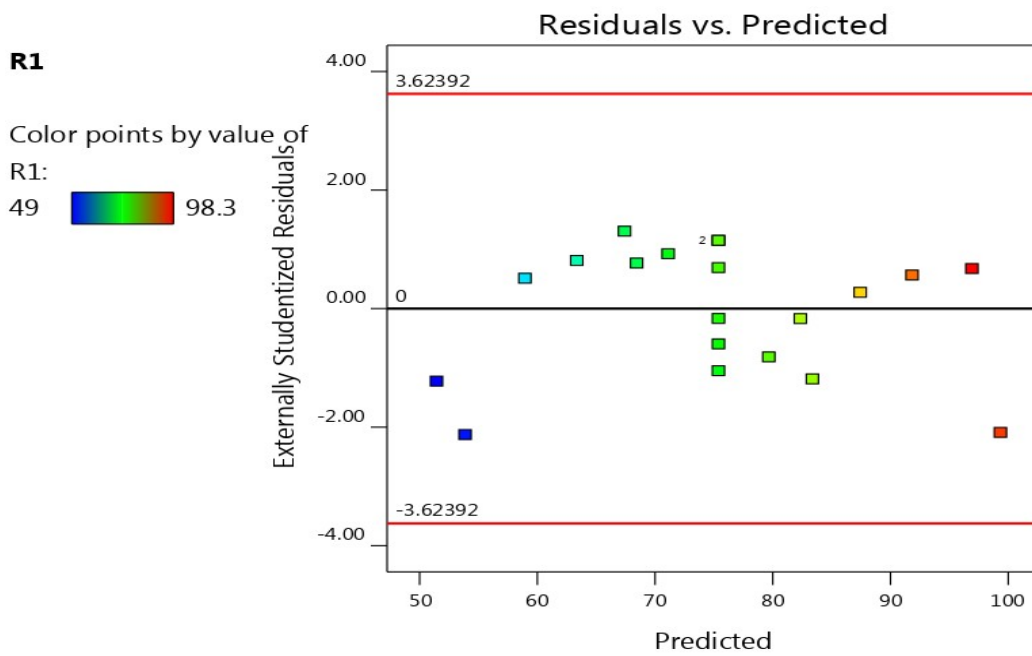

**Fig. S2** The difference between the values obtained from the experiments and the model according to the predicted values

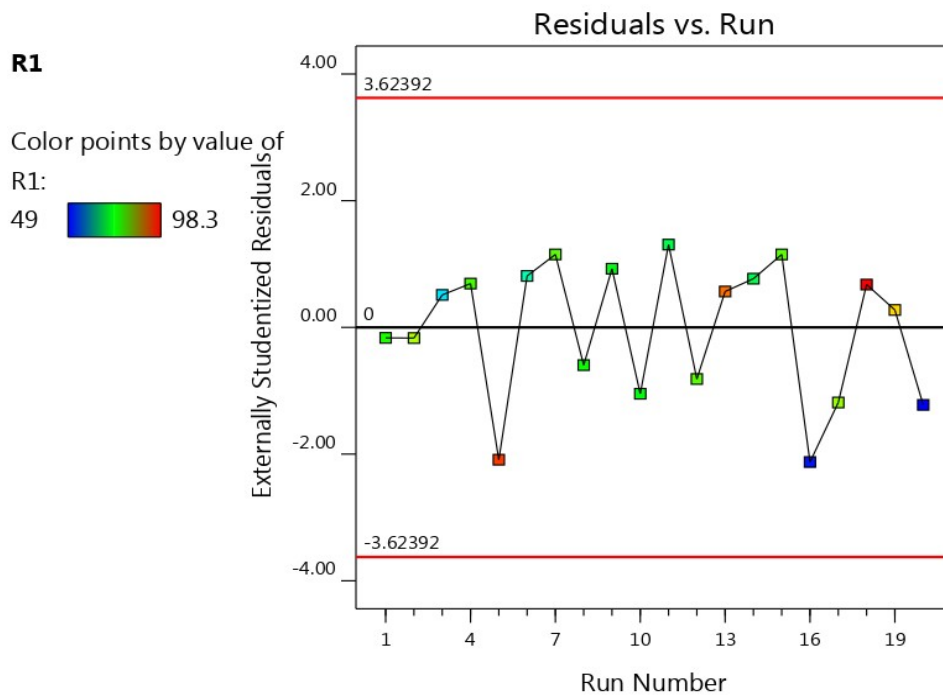

**Fig. S3** The difference between the values obtained from the tests and the model according to the number of tests

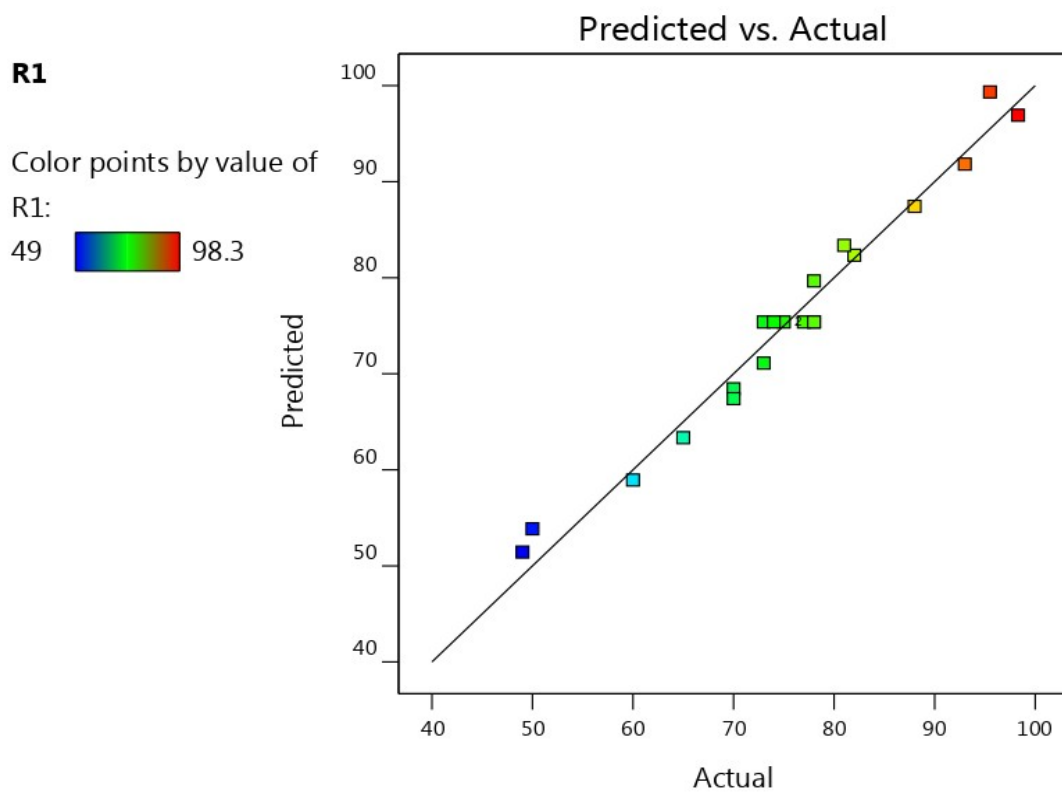

**Fig. S4** Status of values obtained from experiments and predicted values

**Table S1** Full report of calculation results related to each of the parameters in the order of number of experiments

| Run Order | Actual Value | Predicted Value | Residual | Leverage | Internally Studentized Residuals | Externally Studentized Residuals | Cook's Distance | Influence on Fitted Value DFFITS | Standard Order |
|-----------|--------------|-----------------|----------|----------|----------------------------------|----------------------------------|-----------------|----------------------------------|----------------|
| 1         | 75.00        | 75.39           | -0.3900  | 0.050    | -0.170                           | -0.165                           | 0.000           | -0.038                           | 17             |
| 2         | 82.00        | 82.35           | -0.3458  | 0.270    | -0.172                           | -0.167                           | 0.003           | -0.101                           | 4              |
| 3         | 60.00        | 58.94           | 1.06     | 0.270    | 0.526                            | 0.514                            | 0.026           | 0.312                            | 7              |
| 4         | 77.00        | 75.39           | 1.61     | 0.050    | 0.703                            | 0.692                            | 0.007           | 0.159                            | 15             |
| 5         | 95.50        | 99.34           | -3.84    | 0.257    | -1.898                           | -2.088                           | 0.312           | -1.228                           | 13             |
| 6         | 65.00        | 63.35           | 1.65     | 0.270    | 0.821                            | 0.813                            | 0.062           | 0.494                            | 6              |
| 7         | 78.00        | 75.39           | 2.61     | 0.050    | 1.140                            | 1.152                            | 0.017           | 0.264                            | 16             |
| 8         | 74.00        | 75.39           | -1.39    | 0.050    | -0.607                           | -0.595                           | 0.005           | -0.136                           | 19             |
| 9         | 73.00        | 71.12           | 1.88     | 0.257    | 0.931                            | 0.927                            | 0.075           | 0.545                            | 10             |
| 10        | 73.00        | 75.39           | -2.39    | 0.050    | -1.044                           | -1.047                           | 0.014           | -0.240                           | 18             |
| 11        | 70.00        | 67.41           | 2.59     | 0.257    | 1.279                            | 1.307                            | 0.142           | 0.769                            | 12             |
| 12        | 78.00        | 79.66           | -1.66    | 0.257    | -0.822                           | -0.813                           | 0.058           | -0.478                           | 9              |
| 13        | 93.00        | 91.84           | 1.16     | 0.270    | 0.580                            | 0.568                            | 0.031           | 0.345                            | 2              |
| 14        | 70.00        | 68.43           | 1.57     | 0.270    | 0.780                            | 0.770                            | 0.056           | 0.468                            | 5              |
| 15        | 78.00        | 75.39           | 2.61     | 0.050    | 1.140                            | 1.152                            | 0.017           | 0.264                            | 20             |
| 16        | 50.00        | 53.86           | -3.86    | 0.270    | -1.924                           | -2.125                           | 0.342           | -1.291                           | 8              |
| 17        | 81.00        | 83.37           | -2.37    | 0.257    | -1.171                           | -1.185                           | 0.119           | -0.697                           | 11             |
| 18        | 98.30        | 96.92           | 1.38     | 0.270    | 0.688                            | 0.676                            | 0.044           | 0.411                            | 1              |
| 19        | 88.00        | 87.43           | 0.5712   | 0.270    | 0.285                            | 0.276                            | 0.007           | 0.168                            | 3              |
| 20        | 49.00        | 51.44           | -2.44    | 0.257    | -1.204                           | -1.223                           | 0.125           | -0.719                           | 14             |

**Table S2** Precision and accuracy of the method for the determination of DMMP in water samples

| Concentration ( $\mu\text{g ml}^{-1}$ ) | Mean ( $\mu\text{g ml}^{-1}$ ) | SD   | Precision RSD (%) | Accuracy (%) | Percentage difference |
|-----------------------------------------|--------------------------------|------|-------------------|--------------|-----------------------|
| Intra-day ( n=3)                        |                                |      |                   |              |                       |
| 0.2                                     | 0.19                           | 0.03 | 3.0               | 95.0         | -5.0                  |
| 0.8                                     | 0.78                           | 0.07 | 3.2               | 97.5         | -2.5                  |
| Inter-day (n=9)                         |                                |      |                   |              |                       |
| 0.2                                     | 0.19                           | 0.04 | 5.1               | 95.0         | 5.0-                  |
| 0.8                                     | 0.81                           | 0.13 | 5.5               | 101.3        | 1.3                   |

SD, standard deviation;
